# Supplementary material
Source: PubMed Central journal article supplement (PMC5933456)
Supplement: jamaophthalmol-136-637-s001.pdf [file jamaophthalmol-136-637-s001.pdf]

## Supplementary Online Content

Friedman DN, Chou JF, Francis JH, et al. Vision-targeted health-related quality of life in adult survivors of retinoblastoma. *JAMA Ophthalmol*. Published online April 26, 2018.  
doi:10.1001/jamaophthalmol.2018.1082

**eFigure.** Participation and Contact in the Retinoblastoma Survivor Study

**eTable.** Visual Field Questionnaire (NEI-VFQ-25) Subscales by Radiation (RT) Exposure and Laterality

This supplementary material has been provided by the authors to give readers additional information about their work.

**eFigure. Participation and contact in the Retinoblastoma Survivor Study**

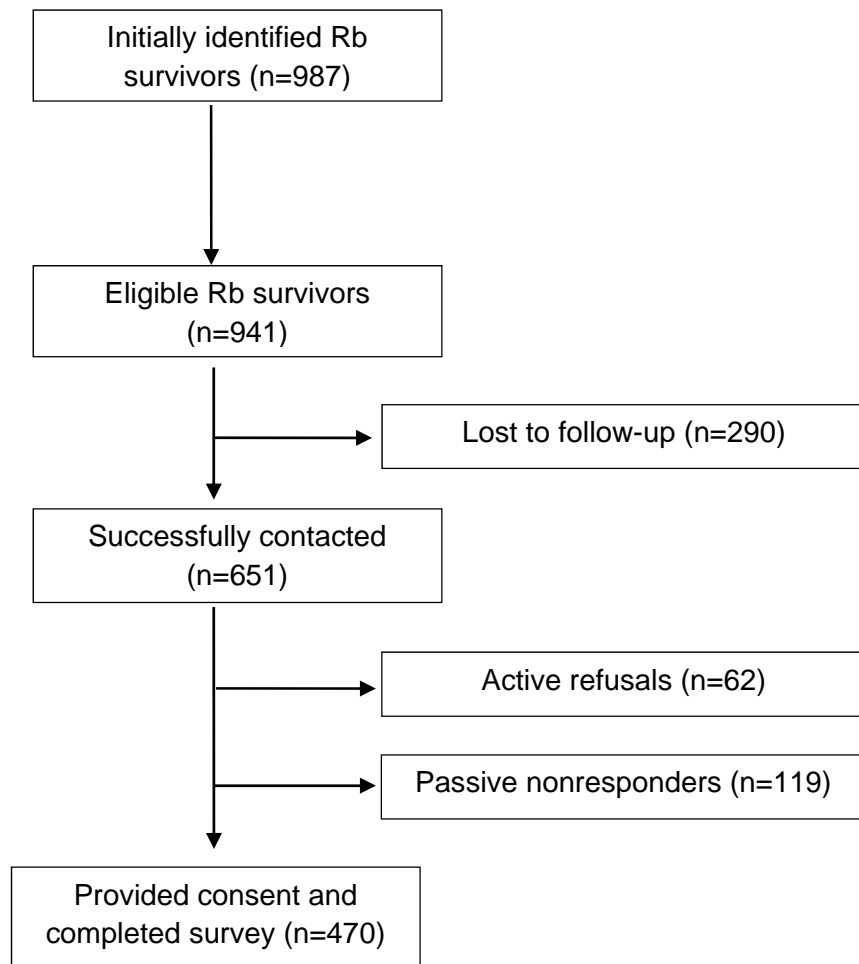

**eTable. Visual Field Questionnaire (NEI-VFQ-25) Subscales by Radiation (RT) Exposure and Laterality**

| NEI VFQ-25         | Unilateral Rb Survivors |                  |                | Bilateral Rb Survivors |                 |                |
|--------------------|-------------------------|------------------|----------------|------------------------|-----------------|----------------|
|                    | Mean (SD)               |                  |                | Mean (SD)              |                 |                |
|                    | RT<br>(n=34)            | No RT<br>(n=180) | <i>P value</i> | RT<br>(n=231)          | No RT<br>(n=20) | <i>P value</i> |
| Overall VFQ        | 89.2 (8.8)              | 91.8 (7.5)       | .07            | 71.7 (18.1)            | 78.2 (17.3)     | .13            |
| Subscale           |                         |                  |                |                        |                 |                |
| General Health     | 72.8 (18.8)             | 78.9 (20.7)      | .056           | 69.2 (22.9)            | 64.4 (20.9)     | .29            |
| General Vision     | 87.1 (10.8)             | 83.7 (15.1)      | .34            | 45.1 (35.4)            | 54.0 (42.1)     | .22            |
| Near Vision        | 94.1 (11.8)             | 94.5 (10.3)      | .86            | 70.4 (25.7)            | 90.7 (16.1)     | .001           |
| Distant Vision     | 91.7 (13.6)             | 95.1 (8.9)       | .050           | 69.9 (25.1)            | 81.5 (24.1)     | .057           |
| Driving            | 87.9 (12.5)             | 89.9 (13.1)      | .29            | 80.3 (20.4)            | 89.3 (10.6)     | .18            |
| Peripheral Vision  | 72.1 (25.9)             | 81.7 (21.2)      | .03            | 58.2 (32.8)            | 67.1 (33.8)     | .27            |
| Color Vision       | 99.3 (4.3)              | 99.1 (5.3)       | .97            | 86.4 (23.7)            | 92.2 (25.4)     | .15            |
| Ocular Pain        | 87.5 (15.7)             | 90.8 (12.3)      | .19            | 83.3 (19.8)            | 90.8 (14.3)     | .10            |
| Role Difficulty    | 89.3 (17.4)             | 91.3 (18.5)      | .38            | 75.3 (25.9)            | 80.0 (22.7)     | .45            |
| Dependency         | 95.3 (9.8)              | 97.9 (9.2)       | .01            | 80.8 (23.1)            | 89.5 (15.0)     | .09            |
| Social Functioning | 94.8 (13.1)             | 97.3 (7.6)       | .50            | 79.6 (24.5)            | 86.7 (20.6)     | .28            |
| Mental Health      | 85.6 (18.2)             | 88.8 (12.9)      | .29            | 74.5 (23.5)            | 78.6 (18.0)     | .78            |

Abbreviations: Rb, retinoblastoma; RT, radiation therapy; NEI-VFQ-25, 25-item National Eye Institute Visual Function Questionnaire. Data are given as mean (SD) unless otherwise indicated.
